# Supplementary material for: The prevalence of occupational injuries and associated risk factors among workers in the iron and steel industries: a systematic review and meta-analysis
Source: Research Square preprint supplement (doi:10.21203/rs.3.rs-3890858/v1), 2024-02-01
Supplement: Supplementary file 1 [file f463a02be184a9296154b2a2.docx]

**Supplementary material for the manuscript:**

**The prevalence of occupational injuries and associated risk factors among workers in the iron and steel industries: a systematic review and meta-analysis**

Saumu Shabani1, Jovine Bachwenkizi1, Simon Henry Mamuya1, Bente Elisabeth Moen2*

**Affiliations:**

1Department of Environmental and Occupational Health, School of Public Health and Social Sciences, Muhimbili University of Health and Allied Sciences, Tanzania

2Department of Global Public Health and Primary Care, Centre for International Health, University of Bergen, 5020 Bergen, Norway.

Records identified from

Databases (n=447)

133 Pubmed

120 Google Scholar
83 Hinari

77 Citation Search

34 Embase

Records removed before

screening:

Duplicate records

removed (n= 49)

Records marked as

ineligible by automation

tools (n=0)

Records excluded (n= 359)

Records screened (n= 398)

SCREED

Studies excluded:

Reason 1 (n=3 wrong study design)

Reason 2 (n=11) did not report the outcome of interest

Reason 3 (n=2) full text not accessible

Reason 4 (n=3) published in predatory journal

Reason 5 (n=5) quality of studies

ELIGIBILITY

Studies assessed for

eligibility (n= 39)

Studies included in review (n=15)

INCLUDED

Figure S1. The PRISMA flow diagram for article searching and selection process of studies.

Table S1. Quality assessment results

| **SN** | **Author year** | **Quality criteria score** | | | | | | | | | |
| --- | --- | --- | --- | --- | --- | --- | --- | --- | --- | --- | --- |
| **A** | **B** | **C** | **D** | **E** | **F** | **G** | **H** | **I** | **Total** |
|  | Asadi Z. | 1 | 0 | 1 | 1 | 0 | 1 | 1 | 1 | 0 | 6 |
|  | Bahrami A. | 1 | 1 | 1 | 0 | 0 | 0 | 0 | 0 | 1 | 4 |
|  | Ballal SG. | 1 | 1 | 1 | 1 | 0 | 0 | 1 | 1 | 0 | 6 |
|  | Benti A. | 1 | 1 | 1 | 0 | 0 | 1 | 1 | 1 | 1 | 7 |
|  | Berhan E. | 1 | 1 | 1 | 0 | 0 | 1 | 0 | 1 | 1 | 6 |
|  | Bylund PO | 1 | 1 | 1 | 1 | 0 | 0 | 1 | 1 | 0 | 6 |
|  | Dell T. | 1 | 1 | 0 | 0 | 0 | 0 | 1 | 1 | 0 | 4 |
|  | Durmaz S. | 1 | 0 | 0 | 0 | 0 | 1 | 0 | 1 | 1 | 4 |
|  | Gonçalves SB. | 1 | 1 | 1 | 1 | 0 | 0 | 1 | 1 | 0 | 6 |
|  | Gulhan B. | 1 | 0 | 1 | 0 | 0 | 0 | 1 | 1 | 1 | 5 |
|  | Jafari etal. | 1 | 0 | 1 | 1 | 0 | 0 | 1 | 0 | 0 | 4 |
|  | Kilfe M. | 1 | 1 | 1 | 0 | 0 | 1 | 0 | 1 | 1 | 6 |
|  | Kumar SG. | 1 | 0 | 1 | 1 | 0 | 1 | 1 | 1 | 1 | 7 |
|  | Manjunatha R. | 1 | 1 | 1 | 0 | 0 | 0 | 0 | 0 | 1 | 4 |
|  | Mazaheri MA. | 1 | 1 | 1 | 1 | 0 | 0 | 1 | 0 | 0 | 5 |
|  | Ogiński A. | 1 | 1 | 1 | 1 | 0 | 0 | 1 | 1 | 0 | 6 |
|  | Ong CN. | 1 | 1 | 1 | 1 | 0 | 0 | 1 | 1 | 0 | 6 |
|  | Rajak R. | 1 | 1 | 1 | 1 | 0 | 1 | 1 | 1 | 1 | 8 |
|  | Schoemaker MJ. | 1 | 1 | 1 | 1 | 0 | 1 | 1 | 1 | 0 | 7 |
|  | Sime A. | 1 | 1 | 1 | 0 | 0 | 1 | 1 | 1 | 1 | 7 |
| **Average** | | | | | | | | | | | 5.75 |

Note: A -– appropriateness of the way used to select study participants, B – adequateness of sample size, C – description of study subjects and settings, D – Standard criteria used for measurement of condition, E–identification of confounding factors, F– Strategies to deal with confounding factors, G- Reliability way of measuring the outcome H – appropriateness of statistical tests used in data analysis and I – adequateness of response rate

Table S2. Sensitivity Analysis

| Excluded study | Pooled Prevalence | LCI 95% | HCI 95% | Cochran Q | p | I 2 | I 2 LCI 95% | I 2 HCI 95% |
| --- | --- | --- | --- | --- | --- | --- | --- | --- |
| Rajak R. | 0.569482 | 0.10033 | 0.977657 | 10877.39 | 0 | 99.88049 | 99.8689 | 99.89105 |
| Kilfe M. | 0.559936 | 0.141185 | 0.939366 | 10940.34 | 0 | 99.88117 | 99.86968 | 99.89166 |
| Sime A. | 0.559226 | 0.139769 | 0.939637 | 10973.29 | 0 | 99.88153 | 99.87008 | 99.89197 |
| Berhan E. | 0.545 | 0.133803 | 0.927387 | 10740.47 | 0 | 99.87896 | 99.86717 | 99.88971 |
| Benti A. | 0.55612 | 0.133293 | 0.941068 | 11010.13 | 0 | 99.88193 | 99.87053 | 99.89232 |
| Kumar etal. | 0.541066 | 0.136361 | 0.920322 | 10730.94 | 0 | 99.87886 | 99.86704 | 99.88962 |
| Gulhan B | 0.559717 | 0.14732 | 0.934331 | 10928.68 | 0 | 99.88105 | 99.86953 | 99.89155 |
| Gonçalves SB. | 0.564871 | 0.12668 | 0.955697 | 10819.1 | 0 | 99.87984 | 99.86816 | 99.89049 |
| Ballal S.G | 0.563168 | 0.139907 | 0.944063 | 10827.68 | 0 | 99.87994 | 99.86827 | 99.89057 |
| Mazaheri MA. | 0.623104 | 0.213517 | 0.959604 | 5355.74 | 0 | 99.75727 | 99.72637 | 99.78468 |
| Schoemaker MJ | 0.356646 | 0.150464 | 0.591921 | 5293.762 | 0 | 99.75443 | 99.72303 | 99.78227 |
| OgiDski A. | 0.560864 | 0.122939 | 0.954178 | 10953.19 | 0 | 99.88131 | 99.86983 | 99.89178 |
| Asadi Z. | 0.553549 | 0.141344 | 0.931656 | 11010.44 | 0 | 99.88193 | 99.87053 | 99.89232 |
| Bylund PO | 0.582263 | 0.140721 | 0.963809 | 9745.119 | 0 | 99.8666 | 99.8531 | 99.87886 |
| Ong CN. | 0.532169 | 0.143125 | 0.902799 | 9548.72 | 0 | 99.86386 | 99.84997 | 99.87646 |

Figure S2. Doi plot

Figure S3 Forest plot of subgroup analysis of pooled prevalence of occupational injuries based on the WHO region

Figure S4. Forest plot of subgroup analysis of pooled prevalence of occupational injuries based on the Data type

Figure S5. Forest plot of the odds ratios (OR) with corresponding 95% CIs of studies on the association of marital status and occupational injury.

Figure S6. Forest plot of the odds ratios (OR) with corresponding 95% CIs of studies on the association of education level and occupational injury.

Figure S7 Forest plot of the odds ratios (OR) with corresponding 95% CIs of studies on the association of age and occupational injury.

Figure S8 Forest plot of the odds ratios (OR) with corresponding 95% CIs of studies on the association of safety training and occupational injury.
